# Supplementary material for: Environmental and Historical Determinants of Patterns of Genetic Differentiation in Wild Soybean (Glycine soja Sieb. et Zucc)
Source: PubMed Central journal article supplement (PMC4782138; doi:10.1038/srep22795), 2016-03-08
Supplement: srep22795-s1.pdf [file srep22795-s1.pdf]

1 **Environmental and Historical Determinants of Patterns of Genetic**

2 **Differentiation in Wild Soybean (*Glycine soja* Sieb. et Zucc)**

3 Shuilian He, Yunsheng Wang, Dezhu Li & Tingshuang Yi

4

5

6 **Supporting Information**

7

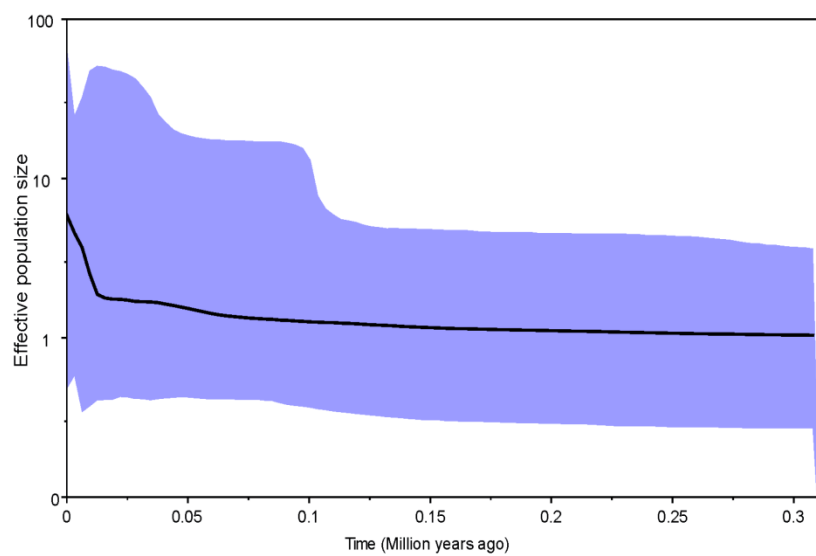

1

2 **Figure S1 The effective population size over time for (a) all 52 populations of wild**

3 **soybean.**

4

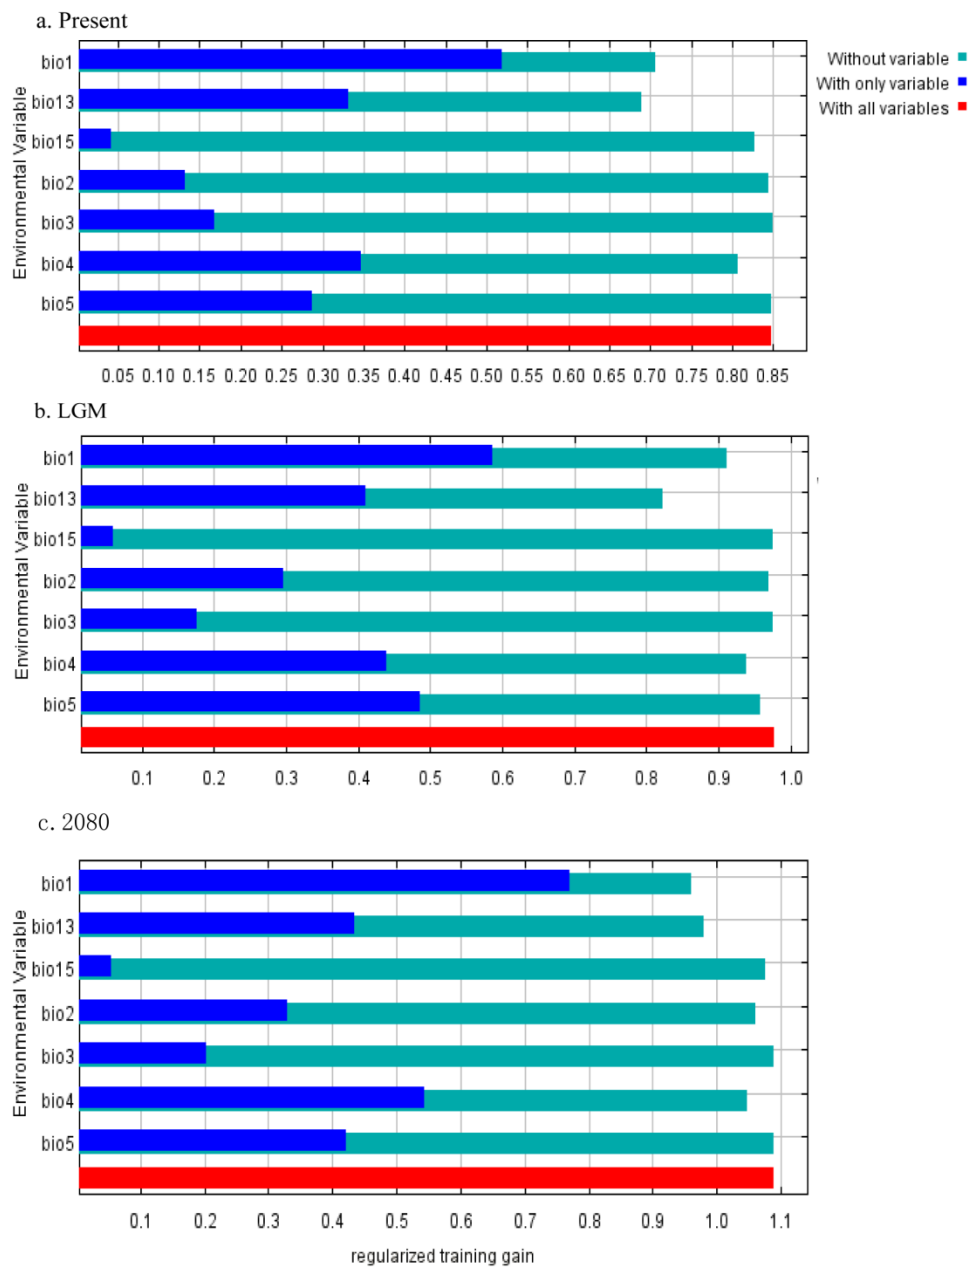

1

2 **Figure S2 Jackknife analyses of individual predictor importance for wild soybean**  
 3 **applied to the Maxent model in relation to overall model quality or “total gain” (grid**  
 4 **bar).** Dark blue bars indicate the gain achieved when including that predictor only and  
 5 excluding remaining predictors; light blue show how the total gain is diminished without the  
 6 given predictor.

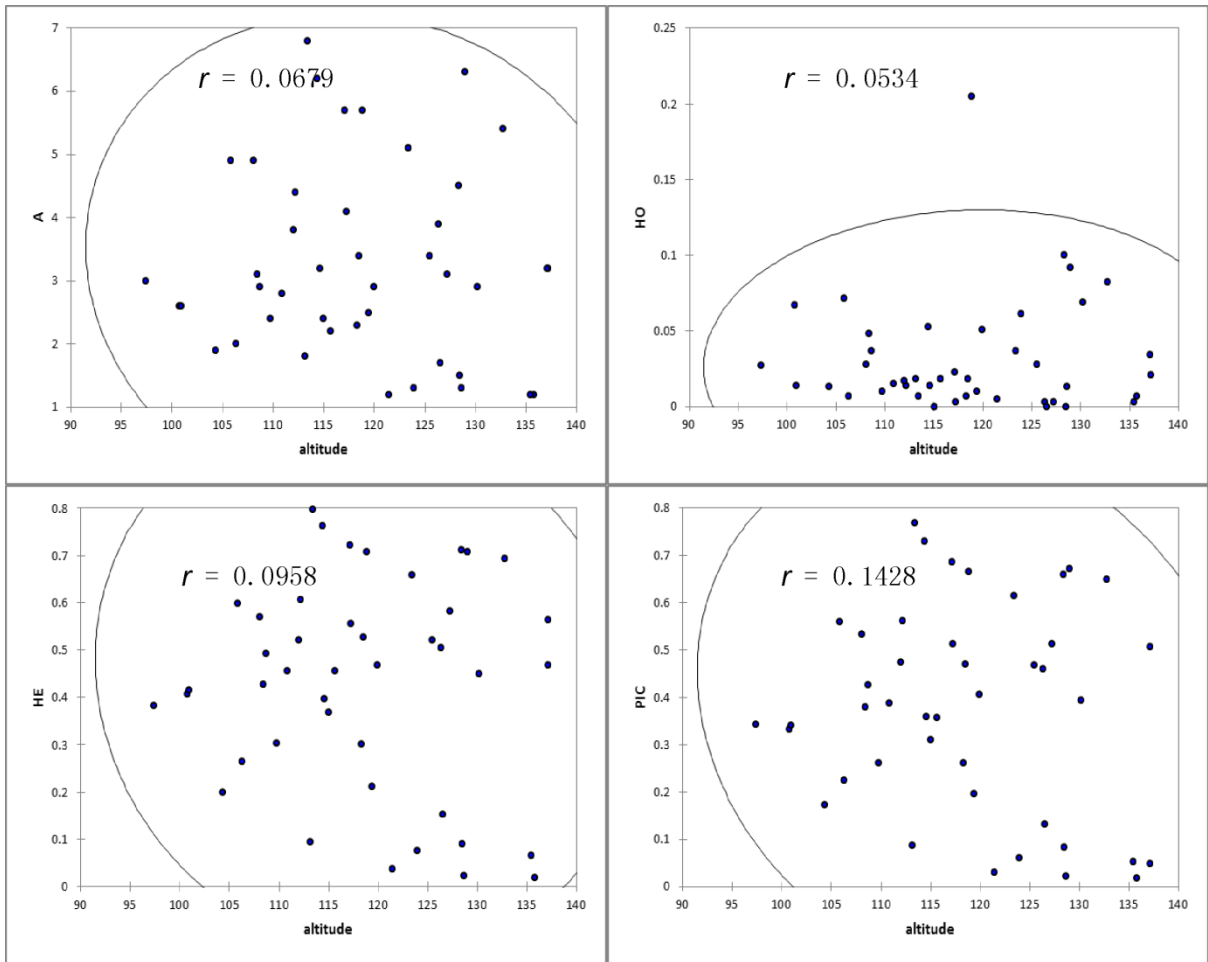

1

2 **Figure S3**Correlation analysis between altitude and genetic diversity.

3

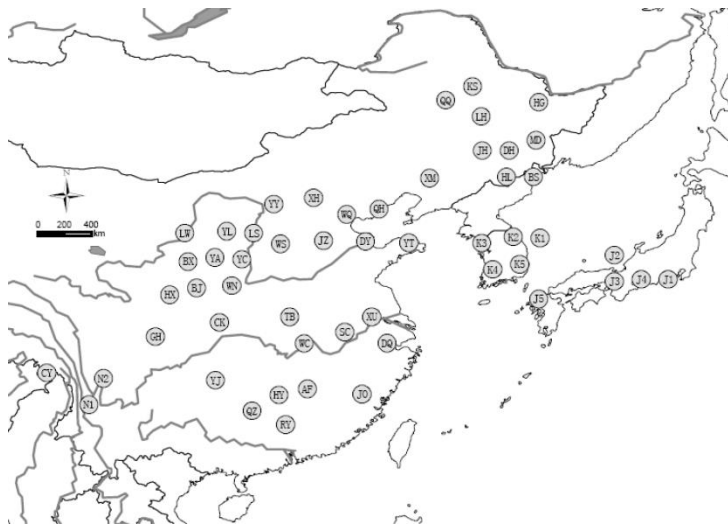

1

2 **Figure S4 Sample locations of 53 wild soybean populations (ArcMap v9.3).**

3

1 **Table S1 Primers and genetic characteristic of the SSR markers used to analyze the collection. For each of the 20 markers, the**  
2 **primer sequence, repeat motif, size range, chromosomal location, number of alleles and genotypes, polymorphism information**  
3 **content (PIC) value and neutral test results are presented. neu: neutral loci; non: non-neutral test.**

| Primer name | Primer sequence(5'to3')                                      | Repeat motif | Size range | linkage group | Allele no. | Genotype no. | PIC   | Neutral test |
|-------------|--------------------------------------------------------------|--------------|------------|---------------|------------|--------------|-------|--------------|
| Satt126     | F:ATAAAACAAATTCGCTGATAT<br>R:GCTTGGTAGCTGTAGGAA              | (ATT)18      | 109-172    | B2            | 16         | 22           | 0.788 | neu          |
| Satt135     | F:TTCCAATACCTCCCAACTAAC<br>R:CACGGATTTTAAATCATTATTACAT       | (ATT)19      | 141-204    | D2            | 13         | 19           | 0.773 | neu          |
| satt215     | F:GCGCCTTCTTCTGCTAAATCA<br>R:CCCATTCAATTGAGATCCAAAATTAC      | (ATT)11      | 114-221    | J             | 23         | 34           | 0.812 | neu          |
| Satt216     | F:TACCCTTAATCACCGGACAA<br>R:AGGGAACAAACACATTTAATCATCA        | (ATT)20      | 137-251    | D1b           | 24         | 41           | 0.909 | non          |
| Satt221     | F:GCGGCAAACCATTATCTTCATT<br>R:GCGATTGTACCACTAAAAACCATAG      | (ATT)23      | 109-224    | D1a           | 36         | 44           | 0.940 | non          |
| Satt231     | F:GGCACGAATCAACATCAAACTTC<br>R:GCGTGTGCAAATGTTTCATCATCT      | (ATT)32      | 160-328    | E             | 36         | 47           | 0.934 | non          |
| satt233     | F:AAGCATACTCGTCGTAAC<br>R:GCGGTGCAAAGATATTAGAAA              | (ATT)16      | 169-238    | A2            | 21         | 33           | 0.863 | neu          |
| Satt270     | F:TGTGATGCCCTTTTCT<br>R:GCGCAGTGCATGGTTTTCTCA                | (ATT)16      | 183-249    | I             | 18         | 22           | 0.764 | neu          |
| satt277     | F:GGTGGTGGCGGGTACTATTACT<br>R:CCACGCTTCAGTTGATTCTTACA        | (ATT)40      | 128-255    | C2            | 32         | 45           | 0.935 | non          |
| satt288     | F:GCGGGGTGATTTAGTGTTTGACACCT<br>R:GCGCTTATAATTAAGAGCAAAAGAAG | (ATT)17      | 195-273    | G             | 25         | 46           | 0.901 | non          |

4

5

1 **Table S1 continue**

| Primer name | Primer sequence(5'to3')                                        | Repeat motif | Size range | linkage group | Allele no. | Genotype no. | PIC   | Neutral test |
|-------------|----------------------------------------------------------------|--------------|------------|---------------|------------|--------------|-------|--------------|
| Satt294     | F:GCGCTCAGTGTGAAAGTTGTTTCTAT<br>R:GCGGGTCAAATGCAAATTATTTTT     | (ATT)23      | 237-303    | C1            | 18         | 26           | 0.902 | non          |
| Satt373     | F:TCCGCGAGATAAAATTCGTA AAAAT<br>R:GGCCAGATACCCAAGTTGTACTTGT    | (TAT)21      | 210-279    | L             | 23         | 35           | 0.914 | non          |
| Satt423     | F:TTCGCTTGGGTT CAGT TACTT<br>R:GTTGGGGAATTA AAAAAAATG          | (ATT)19      | 225-351    | F             | 24         | 37           | 0.878 | neu          |
| Satt463     | F:CTGCAAATTTGATGCACATGTGTCTA<br>R:TTGGATCTCATATTCAA ACTTTCAAG  | (ATT)19      | 100-214    | M             | 29         | 31           | 0.917 | non          |
| satt509     | F:GCGCAAGTGGCCAGCTCATCTATT<br>R:GCGCTACCGTGTGGTGGTGTGCTACCT    | (ATT)30      | 119-242    | B1            | 22         | 32           | 0.921 | non          |
| Satt530     | F:CCAAGCGGGTGAAGAGGTTTTT<br>R:CATGCATATTGACTTCATTATT           | (ATT)12      | 201-279    | N             | 25         | 34           | 0.916 | non          |
| satt555     | F:GCGGTTGGCTTTGATGATGT<br>R:TTACCGCATGTTCTTGGACTA              | (ATT)13      | 234-312    | K             | 20         | 33           | 0.889 | non          |
| Satt568     | F:CGGACACCGGTCTACTAGGAAAGTAA<br>R:GCGGAATAATCCAATTCAATTTA      | (ATT)17      | 212-275    | H             | 19         | 28           | 0.903 | non          |
| satt572     | F:GCGGAGCATGTAAATCCAGCCTATTGA<br>R:GCGGGCTAACTTATGTTACTAAACAAT | (ATT)14      | 130-241    | A1            | 27         | 36           | 0.934 | non          |
| satt581     | F:CCAAAGCTGAGCAGCTGATAACT<br>R:CCCTCACTCCTAGATTATTTGTTGT       | (ATT)11      | 130-196    | O             | 16         | 32           | 0.870 | non          |
| mean        |                                                                |              |            |               | 23         | 34           | 0.883 |              |

2  
3  
4

**Table S2 The sampling locality, longitude, latitude, altitude and habitate of 53 wild soybean populations**

| Pop. | Location                                 | Latitude (N) | Longitude (E) | Altitude (m) | sampling |
|------|------------------------------------------|--------------|---------------|--------------|----------|
| AF   | Anfu county, Jiangxi province            | 27°23'17"    | 114°36'06"    | 85           | Seq, SSR |
| JO   | Jianou county, Fujian province           | 27°01'28"    | 118°17'34"    | 126          | Seq, SSR |
| HY   | Hengyang county, Hunan province          | 26°57'43"    | 112°09'12"    | 123          | Seq, SSR |
| RY   | Ruyuan county, Guangdong province        | 24°55'12"    | 113°08'12"    | 510          | Seq, SSR |
| QZ   | Quanzhou county, Guangxi Zhuang province | 25°52'21"    | 110°51'43"    | 722          | Seq, SSR |
| WC   | Wuchang district, Hubei province         | 30°31'16"    | 114°23'44"    | 15           | Seq, SSR |
| XU   | Xuanwu district, Jiangsu province        | 32°02'44"    | 118°51'39"    |              | Seq, SSR |
| WQ   | Duqing county, Zhejiang province         | 30°33'00"    | 119°58'20"    | 15           | Seq, SSR |
| SC   | Shucha county, Anhui province            | 31°18'51"    | 117°07'40"    | 45           | Seq, SSR |
| TB   | Tongbai county, Henan province           | 32°22'12"    | 113°24'01"    | 33           | Seq, SSR |
| CK   | Chengkou county, Chongqing               | 31°58'98"    | 108°40'02"    | 805          | Seq, SSR |
| YJ   | Yinjiang county, Guizhou province        | 28°00'03"    | 108°24'36"    | 458          | Seq, SSR |
| GH   | Guanghan city, Sichuan province          | 30°59'49"    | 104°20'55"    | 458          | Seq, SSR |
| CY   | Chayu county, Xizang province            | 27°03'53"    | 100°50'03"    | 1685         | Seq, SSR |
| N1   | Ninglang county, Yunnan province         | 28°30'08"    | 97°00'38"     | 2600         | Seq, SSR |
| N2   | Ninglang county, Yunnan province         | 28°06'54"    | 99°51'02"     | 2550         | Seq, SSR |
| BX   | Bingxian county, Shaanxi province        | 35°02'26"    | 108°04'39"    | 835          | Seq, SSR |
| HX   | Huixian county, Gansu province           | 33°53'36"    | 105°49'33"    | 1126         | Seq, SSR |
| YY   | Youyu county, Shanxi province            | 40°08'38"    | 112°20'22"    | 1279         | Seq      |
| LW   | Lingwu county, Ningxia province          | 38°08'44"    | 106°19'33"    | 1103         | Seq, SSR |
| WS   | Wenshui county, Shaanxi province         | 37°25'02"    | 112°01'02"    | 759          | Seq, SSR |
| YA   | Yan'an county, Shaanxi province          | 36°37'29"    | 109°27'18"    | 962          | Seq      |
| YL   | Yulin city, Shaanxi province             | 38°16'50"    | 109°44'18"    | 1051         | Seq, SSR |
| LS   | Linxian county, Shaanxi province         | 37°56'51"    | 110°59'15"    | 948          | Seq      |
| YC   | Yichuan county, Shaanxi province         | 36°03'31"    | 110°11'20"    | 829          | Seq      |
| BJ   | Baoji city, Shaanxi province             | 34°22'04"    | 107°0'05"     | 586          | Seq      |
| JZ   | Jizhou county, Hebei province            | 37°44'31"    | 115°41'12"    | 23           | Seq, SSR |
| WN   | Weinan city, Shaanxi province            | 34°31'01"    | 109°30'00"    | 355          | Seq      |
| DY   | Dongying city, Shandong province         | 37°34'25"    | 118°31'27"    | 6            | Seq, SSR |
| DQ   | Wuqing district, Tianjing                | 39°26'57"    | 117°14'57"    | -6           | Seq, SSR |



**Table S2 continue**

| Pop. | Location                               | Latitude (N) | Longitude (E) | Altitude (m) | sampling |
|------|----------------------------------------|--------------|---------------|--------------|----------|
| XH   | Xuanhua county, Hebei province         | 40 °35′ 34″  | 115 °01′ 17″  | 601          | Seq, SSR |
| QH   | Qinghuangdao city, Hebei province      | 39 °48′ 29″  | 119 °25′ 54″  | 18           | Seq, SSR |
| YT   | Yantai city, Shandong province         | 37 °28′ 65″  | 121 °27′ 14″  | 10           | Seq, SSR |
| LX   | Lanxi county, Heilongjiang province    | 46 °13′ 06″  | 126 °20′ 16″  | 139          | Seq, SSR |
| JH   | Jiaohe county, Jinlin province         | 43 °48′ 28″  | 127 °14′ 15″  | 126          | Seq, SSR |
| SY   | Xinming county, Liaoning province      | 41 °57′ 19″  | 122 °51′ 29″  | 28           | Seq, SSR |
| MD   | Mudanjiang city, Heilongjiang province | 44 °34′ 07″  | 129 °36′ 26″  | 253          | Seq      |
| BS   | Baishan city, Jilin province           | 42 °27′ 00″  | 128 °07′ 44″  | 701          | Seq      |
| KS   | Keshan county, Heilongjaing province   | 48 °17′ 00″  | 125 °29′ 54″  | 325          | Seq, SSR |
| QQ   | Qiqihaer city, Heilongjiang province   | 47 °20′ 27″  | 123 °56′ 24″  | 304          | Seq, SSR |
| HG   | Hegan city, Heilongjiang province      | 47 °12′ 20″  | 130 °13′ 46″  | 213          | Seq      |
| DH   | Dunhua city, Jilin province            | 43 °22′ 28″  | 128 °13′ 36″  | 495          | Seq      |
| HL   | Hulin city, Heilongjiang province      | 42 °02′ 24″  | 128 °03′ 16″  | 73           | Seq, SSR |
| J1   | Kanagawa, Japan                        | 34 °57′ 33″  | 137 °08′ 20″  | 12           | Seq, SSR |
| J2   | Tokyo, Japan                           | 34 °49′ 41″  | 135 °46′ 13″  | 35           | Seq, SSR |
| J3   | Hirakata,Osaka,Japan                   | 34 °48′ 52″  | 135 °29′ 02″  | 11           | Seq, SSR |
| J4   | Okazaki, Japan                         | 34 °57′ 33″  | 137 °08′ 20″  | 37           | Seq, SSR |
| J5   | Kyushu University, Fukuoka, Japan      | 33 °35′ 47″  | 130 °12′ 55″  | 48           | Seq, SSR |
| K1   | Gangwon-do, South Korea                | 37 °35′ 15″  | 128 °24′ 33″  | 520          | SSR      |
| K2   | Gangwon-do, South, Korea               | 37 °54′ 47″  | 128 °29′ 56″  | 340          | Seq, SSR |
| K3   | Incheon, South Korea                   | 37 °27′ 30″  | 126 °21′ 53″  | 11           | Seq, SSR |
| K4   | Yeongcheon-si city, Korea              | 37 °54′ 47″  | 128 °29′ 56″  | 102          | Seq, SSR |
| K5   | Moonkyeong-si city, Korea              | 37 °27′ 30″  | 126 °21′ 53″  | 77           | Seq, SSR |
